# Supplementary material for: Synergistic effects of MoS2-decorated in situ NiFe nanoalloys/NiFe-LDH with superhydrophilicity for electrocatalytic overall water splitting
Source: Royal Society of Chemistry journal article supplement (doi:10.1039/d2qi02548e), 2023-01-01
Supplement: d2qi02548e1.pdf [file d2qi02548e1.pdf]

Supplementary Information

**Synergistic effect of MoS<sub>2</sub> decorated in situ NiFe  
nanoalloys/NiFe-LDH with super hydrophilicity for  
electrocatalytic overall water splitting**

Minghui Hao<sup>a</sup>, Zhiying Xu<sup>a</sup>, Xin Liu<sup>b</sup>, Liang Wang<sup>a</sup>, Chunhu Li<sup>a</sup> and Wentai Wang<sup>a\*</sup>

<sup>a</sup> Key Laboratory of Marine Chemistry Theory and Technology, Ministry of Education; College of Chemistry and Chemical Engineering, Ocean University of China, Qingdao, 266100, China. Email: [wentaiwang@ouc.edu.cn](mailto:wentaiwang@ouc.edu.cn)

<sup>b</sup> Institute for New Energy Materials and Low-Carbon Technologies, Tianjin University of Technology, Tianjin, 300384, China.

## 1. Materials and reagents

Nickel sulfate hexahydrate (NiSO<sub>4</sub>·6H<sub>2</sub>O), thiourea, urea (CH<sub>4</sub>N<sub>2</sub>O), ammonium fluoride (NH<sub>4</sub>F) and KOH were provided by Sinopharm Chemical Reagent Co., Ltd. Iron sulfate heptahydrate (FeSO<sub>4</sub>·7H<sub>2</sub>O), sodium molybdate dihydrate (Na<sub>2</sub>MoO<sub>4</sub>·2H<sub>2</sub>O) was purchased by Tianjin BASF Chemical Co., Ltd. These above reagents are AR grade and can be used directly in this experiment without additional purification.

## 2. Characterizations

X-ray photoelectron spectroscopy (XPS, PHI 5300 ESCA system) were collected to explore the surface chemical state and the valence state. The microscopic morphology and element distribution of the MoS<sub>2</sub>/NF/NFL/CC were analyzed by transmission electron microscopy (TEM, FEI Quanta 200F) and scanning electron microscopy (SEM, Regulus EU8100). The crystal structure of the MoS<sub>2</sub>/NF/NFL/CC were revealed by the X-ray diffraction (XRD, Philips) with Cu- K $\alpha$  radiation.

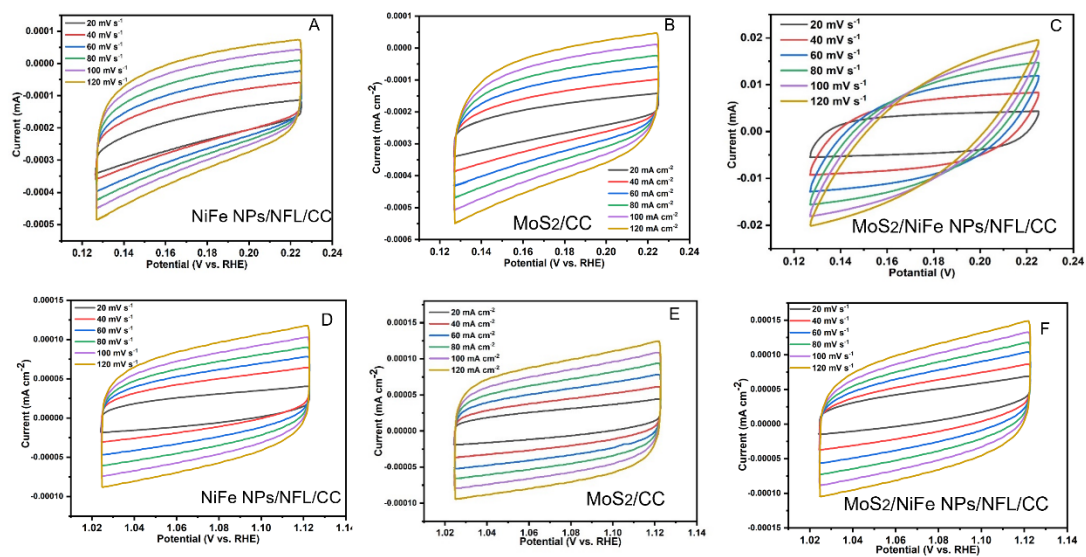

**Fig. S1 (A-F)** CV curves of the NiFe NPs/NFL/CC, MoS<sub>2</sub>/CC and MoS<sub>2</sub>/ NiFe NPs /NFL/CC at varied scan rate and potential range.
